# Supplementary material for: The first 3D analysis of the sphenoid morphogenesis during the human embryonic period
Source: PubMed Central journal article supplement (PMC8960892; doi:10.1038/s41598-022-08972-w), 2022-03-28

### Supplementary Table 1

Sample ID and CRL (mm) for the present study.

CS, Carnegie stage; CRL, crown-rump length; HS, histological section; PCX-CT, phase-contrast CT; NA, not available value

| CS | ID (HS) | CRL (HS) | ID (PCX-CT) | CRL (PCX-CT) |
|----|---------|----------|-------------|--------------|
| 17 | 111     | 12       | 14676       | 9.5          |
|    | 505     | 14.4     | 14771       | 8.5          |
|    | 640     | 10.5     | 15022       | 9.1          |
|    | 830     | 11       | 17805       | 10.2         |
|    | 887     | NA       | 17832       | 9.8          |
|    | 1440    | 10.4     | 19370       | 9.5          |
|    | 1583    | 11.8     | 20042       | 10.2         |
|    | 3239    | 10       |             |              |
|    | 3477    | 11.1     |             |              |
|    | 3837    | 9.9      |             |              |
|    | 4242    | 14.5     |             |              |
|    | 33763   | 12.3     |             |              |
| 18 | 202     | 15.6     | 22103       | 11.9         |
|    | 1250    | 13.9     | 24594       | 11.6         |
|    | 1633    | 13.2     | 24638       | 11.6         |
|    | 2643    | 12.8     | 24654       | 12.7         |
|    | 2706    | 14.1     | 28166       | 15.9         |
|    | 3006    | 15       | 31870       | 11.8         |
|    | 15799   | 15       | 32109       | 10.9         |
|    | 24992   | 12       | 32404       | 11.5         |
|    | 25391   | 13       |             |              |
|    | 28129   | 11.8     |             |              |
| 19 | 32      | 15       | 16219       | 17           |
|    | 829     | 16       | 17944       | 17.8         |
|    | 2114    | 17.5     | 21011       | 15.3         |
|    | 2425    | 17.2     | 22621       | 14.9         |
|    | 3002    | 18.4     | 24092       | 17.3         |
|    | 4081    | 15.6     | 25519       | 13           |
|    | 4424    | 15.2     | 27948       | 13.8         |
|    | 7711    | 16.5     | 28447       | 15.8         |

|    |       |      |       |      |
|----|-------|------|-------|------|
|    | 7778  | 16.4 | 29160 | 17.3 |
|    | 16559 | 16.3 | 31686 | 16.5 |
|    |       |      | 31851 | 21   |
|    |       |      | 33249 | 14.8 |
| 20 | 1125  | 18   | 19836 | 17.4 |
|    | 1770  | 18.9 | 20268 | 18.7 |
|    | 1950  | 20   | 21344 | 19.4 |
|    | 2006  | 15.9 | 21594 | 17.5 |
|    | 4330  | 18.6 | 22171 | 17   |
|    | 7271  | 16.9 | 22403 | 16.8 |
|    | 10940 | 17.7 | 24649 | 18.1 |
|    | 12113 | 17.9 | 25322 | 15.6 |
|    | 13800 | 16.5 | 26354 | 19.8 |
|    | 15050 | 17   | 32108 | 17.4 |
| 21 | 291   | 20   | 24325 | 19   |
|    | 956   | 20.2 | 24488 | 19.9 |
|    | 1071  | 20.9 | 24728 | 20.9 |
|    | 1074  | 20   | 26546 | 20.3 |
|    | 1634  | 17.4 | 29762 | 19.4 |
|    | 4168  | 22.3 | 30652 | 18.5 |
|    | 5177  | NA   | 33434 | 22   |
|    | 5767  | 18.3 |       |      |
|    | 11235 | 22   |       |      |
|    | 11315 | 19.9 |       |      |
| 22 | 776   | 26   | 16686 | 19.2 |
|    | 2027  | 20.5 | 23275 | 19.8 |
|    | 2705  | 20.2 | 27050 | 22.2 |
|    | 3098  | 20.7 | 27545 | 21.2 |
|    | 5862  | 21   | 32163 | 23.1 |
|    | 8002  | 20.8 | 38466 | 21.4 |
|    | 9305  | 22   |       |      |
|    | 12246 | 21.2 |       |      |
|    | 14814 | 23.7 |       |      |
| 23 | 2530  | 24.7 | 19312 | 23.1 |
|    | 4089  | 24.5 | 24582 | 28.9 |
|    | 4434  | NA   | 25425 | 25.8 |

|       |      |       |      |
|-------|------|-------|------|
| 10273 | 27.3 | 29137 | 28.2 |
|       |      | 30363 | 25.8 |
|       |      | 52578 | 25.5 |
|       |      | 52817 | 24.5 |

---

### Supplementary Figure 1

Schema of primary cartilaginous elements of the sphenoid during human embryonic period.

AT, ala temporalis; AP, alar process; B, basisphenoid; ME, mesethmoid; MP, medial pterygoid process; OS, orbitosphenoid; PS, presphenoid

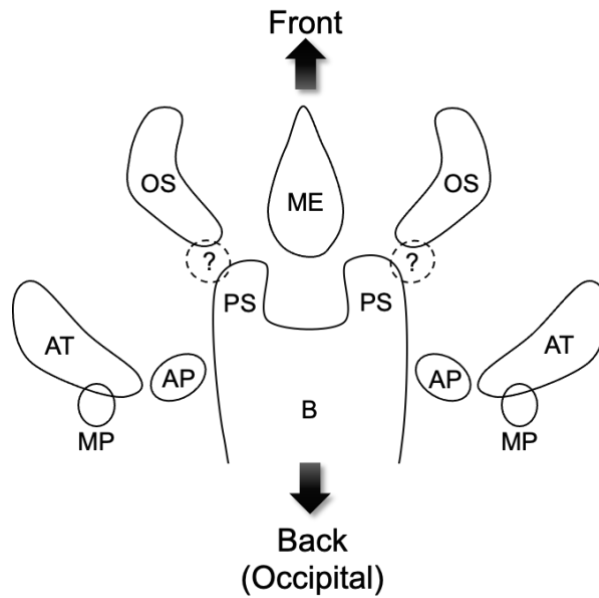

### Supplementary Figure 2

Examples of “mesenchymal cell condensation” which was counted as “1” in HS and PCX-CT (for **Table 2** examination).

(A) Cellular condensation of the orbitosphenoid in CS 17 embryo (arrowhead).

(B) Cellular condensation of the ethmoid in CS 20 embryos which has just appeared (above, arrowhead) and has grown afterward (below, arrowhead). We counted both as “1”.

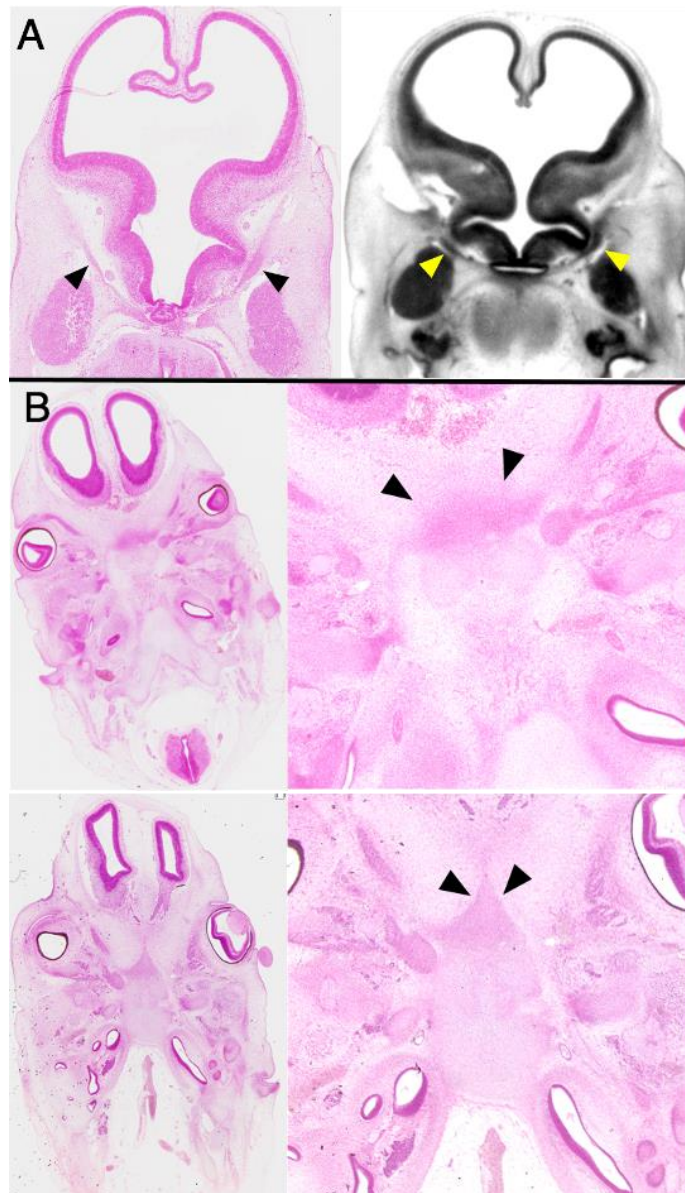

### Supplementary Figure 3

Examples of how the sphenoid are observed in each stage using HS and PCX-CT. Samples of HS are displayed in the upper row, and those of PCX-CT are in the lower. All figures show a horizontal slice at the level of the basisphenoid. Asterisk (\*) shows the eye primordium. AT, ala temporalis; AP, alar process; B, basisphenoid; H, hypophysis; ME, mesethmoid; OS, orbitosphenoid; PS, presphenoid; R, root of the orbitosphenoid; TG, trigeminal ganglion; TV, the third ventricle.

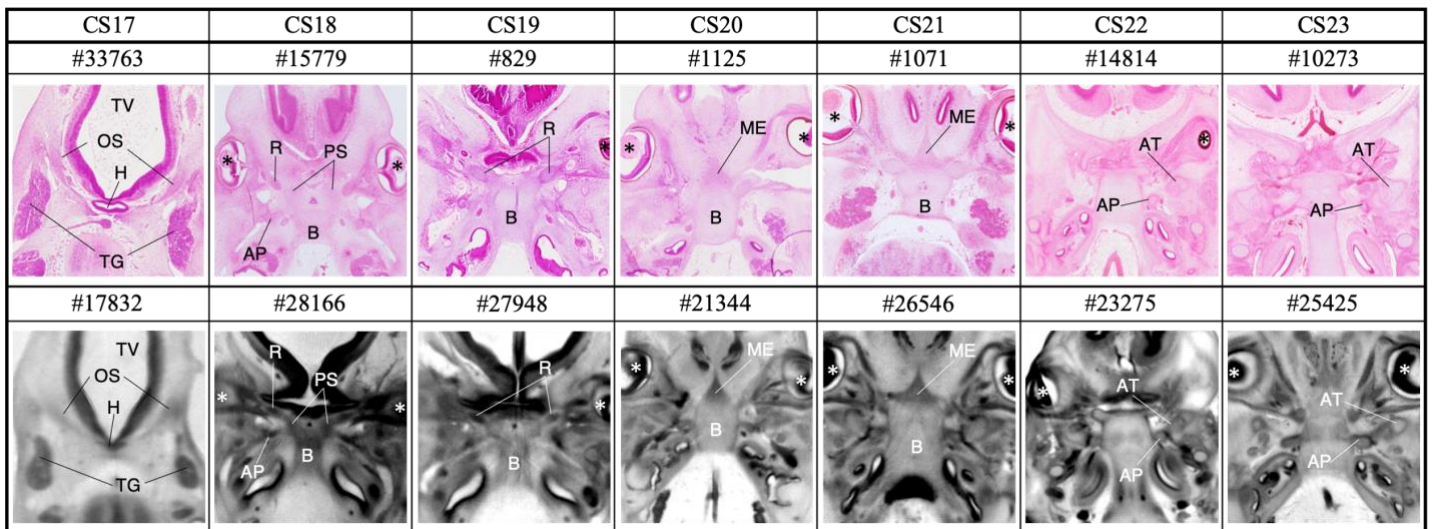

#### Supplementary Figure 4

Example of manual segmentation of the ala temporalis using 3D slicer (CS21 embryo). Most sphenoid elements were identified only by PCX-CT with no difficulty when we observed them by serial and multidirectional images using DICOM observing tools, while we needed to use HS in advance for identification of some unclear elements as the figure shows. Then, we manually segmented it with PCX-CT data and stacked to reconstruct 3D models.

AT; ala temporalis, TN; trigeminal nerve.

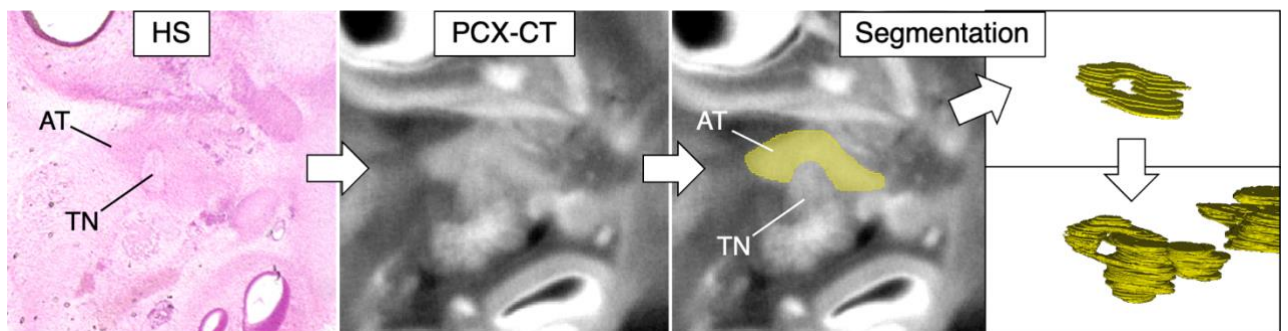

### Supplementary Figure 5

Landmarks for cranial base measurement.

This figure shows a sagittal cross section of CS23 embryo (#25425) using PCX-CT and three landmarks for cranial base measurement. Cutaneous nasion (Na): the most recessed point on the skin above the nose with the largest curvature. Sella (S): the center of the hypophysis. Basion (Ba): the most posterior point of the occipital.

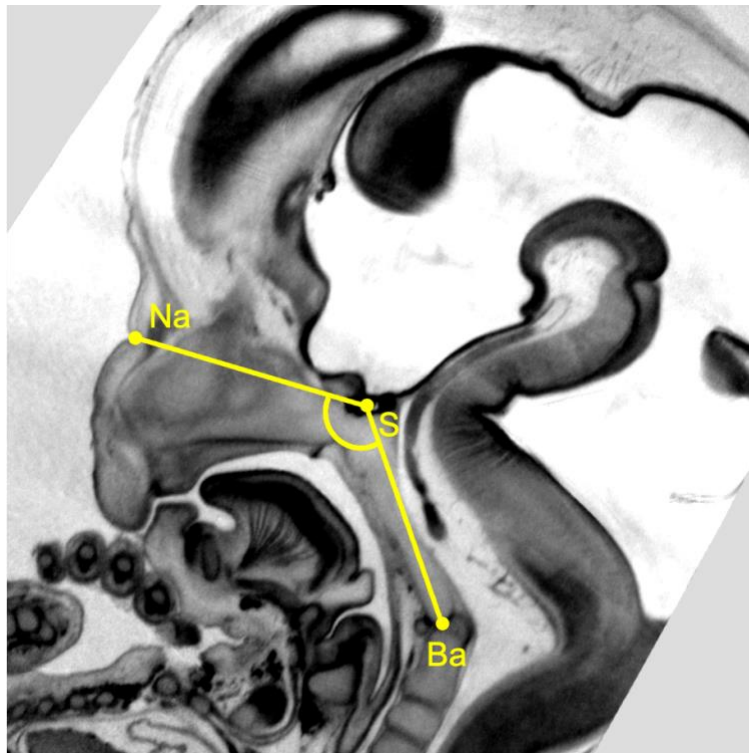

Supplement: 41598_2022_8972_MOESM1_ESM.pdf [file 41598_2022_8972_MOESM1_ESM.pdf]
